# Supplementary material for: Brassinosteroid overproduction improves lignocellulose quantity and quality to maximize bioethanol yield under green-like biomass process in transgenic poplar
Source: PubMed Central journal article supplement (PMC6969456; doi:10.1186/s13068-020-1652-z), 2020-01-18
Supplement: 13068_2020_1652_MOESM1_ESM.pdf [file 13068_2020_1652_MOESM1_ESM.pdf]

**Table S1. Information on *DET2* genes.**

| No. | Genes  | Accessions       | No. | Genes   | Accessions     |
|-----|--------|------------------|-----|---------|----------------|
| 1   | AtDET2 | AT2G38050.1      | 11  | MeDET2  | XP_021619903.1 |
| 2   | VvDET2 | XP_002277900.1   | 12  | JcDET2  | XP_012087924.1 |
| 3   | OsDET2 | LOC_Os01g63260.1 | 13  | PbDET2  | XP_009370214.1 |
| 4   | GhDET2 | AAN28012.1       | 14  | PeDET2  | XP_011009141.1 |
| 5   | GbDET2 | AIY32624.1       | 15  | PtrDET2 | XP_006382738.1 |
| 6   | GrDET2 | XP_012458951.1   | 16  | MnDET2  | XP_010101824.1 |
| 7   | ZmDET2 | NP_001149816.1   | 17  | HaDET2  | XP_021998413.1 |
| 8   | SlDET2 | NP_001234040.1   | 18  | CqDET2  | XP_021741624.1 |
| 9   | ScDET2 | ABD96045.1 5     | 19  | AiDET2  | XP_016198496.1 |
| 10  | SbDET2 | AEW49992.1       | 20  | EgDET2  | XP_010053477.1 |

Pe: *Populus euphratica*, Ptr: *P. trichocarpa*, Me: *Manihot esculenta*, Jc: *Jatropha curcas*, Ai: *Arachis ipaensis*, Vv: *Vitis vinifera*, Ha: *Helianthus annuus*, Pb: *Pyrus x bretschneideri*, At: *A. thaliana*, Cq: *Chenopodium quinoa*, Mn: *Morus notabilis*, Eg: *Eucalyptus grandis*, Gr: *Gossypium raimondii*, Gb: *Gossypium barbadense*, Gh: *Gossypium hirsutum*, Sl: *Solanum lycopersicum*, Sc: *Solanum chacoense*, Os: *Oryza sativa*, Zm: *Zea mays*, Sb: *Sorghum bicolor*.

**Table S2. Gene-specific primers used for PCR amplification.**

| Genes          | Purpose      | Forward primer (5'-3')     | Reverse primer (5'-3')     |
|----------------|--------------|----------------------------|----------------------------|
| <i>PtoDET2</i> | Gene cloning | ATGGCCCTATTAGATCAGAG       | AGCTTCAACACAGAAAAGG        |
|                | Cas9-T1      | GTCATCCTATCCATTTACCTCAT    | AAACATGAGGTAAATGGATAGGA    |
|                | Cas9-T2      | ATTGCACCTGCATCTACCCACTT    | AAACAAGTGGGTAGATGCAGGTG    |
|                | Cas9-T3      | ATTGATTGTGGAGTGGCTTGGAT    | AAACATCCAAGCCACTCCACAAT    |
|                | Q-PCR        | GGTCCTACAATCTCTCCACCCTTG   | AGGAGGAGTGTGAGCCAAAGAG     |
| <i>Hyg</i>     | PCR          | ATCGGACGATTGCGTCGCATC      | GTGTCACGTTGCAAGACCTG       |
| <i>CPD</i>     | Q-PCR        | TGCCCAGGATATGAGCTTGC       | TCGCTTCTGTGTCCGTGTAG       |
| <i>ROT3.1</i>  | Q-PCR        | GCTGCTGGCTACACTTCTCA       | GGTGACCTCAAGAAACCACCA      |
| <i>CYP84A2</i> | Q-PCR        | AGCAGTTCATGGCTCCACTC       | AGTGCCAGGAAGGTCAATCG       |
| <i>LBD38</i>   | Q-PCR        | GAAGAGTCTGAAACCACAACAC     | CTTGTTTCAGTCGCTCATGTATG    |
| <i>CLE14</i>   | Q-PCR        | AGCTCATTTTGTCTCTCACGAG     | TTTGGCTAAGCTTGAAATCACG     |
| <i>EXPA5</i>   | Q-PCR        | TACCACCGTCTATCTCCACTGTC    | GGCTAACCATCGTTTGCG         |
| <i>EXPA12</i>  | Q-PCR        | TGACAAGGAGTATCAGTATTTTTCG  | AGGTGTATCTATCAGGCGAGGA     |
| <i>CESA2B</i>  | Q-PCR        | AGGTAAAGATGGAGCGG          | ACGAGGTTGATGATCAAGCC       |
| <i>CESA3A</i>  | Q-PCR        | CCAGGCAACCACTATGGAGAA      | ATTAGGCTCACCTCACGCT        |
| <i>GT8D</i>    | Q-PCR        | GAATTTATGGACGAAGTCAAGAACAC | GCTGCTTCGGTATGCTACTTGATGCT |
| <i>GT43B</i>   | Q-PCR        | CCAGCTCCACCAAGCTCTAA       | ATGATCCAACCTCTGCTTCGGG     |
| <i>GH9A1</i>   | Q-PCR        | CCGCTGTCCACCATTTCATAA      | CGGGCTGTGTTACTCTCTC        |
| <i>GH9A2</i>   | Q-PCR        | GCTGTGCCTCGCCATCGTCACAA    | GAGCAAGGGTGTAGTTATCAGCG    |
| <i>UBQ</i>     | Q-PCR        | GTTGATTTTGTCTGGGAAGC       | GATCTTGGCCTTCACGTTGT       |

**Table S3. Total pectin and lignin contents (% biomass) in stems of transgenic lines and WT.**

| Samples                | Pectin (% biomass) |      | Total Lignin (% biomass) |
|------------------------|--------------------|------|--------------------------|
| WT                     | 3.21 ± 0.05        |      | 20.61 ± 0.21             |
| <i>PtoDET2</i> -OE-L1  | 3.65 ± 0.06**      | +13% | 20.43 ± 0.10             |
| <i>PtoDET2</i> -OE-L5  | 3.50 ± 0.05**      | +9%  | 20.10 ± 0.42             |
| <i>PtoDET2</i> -KO-L11 | 2.93 ± 0.11**      | -9%  | 19.90 ± 0.32             |
| <i>PtoDET2</i> -KO-L17 | 2.85 ± 0.08**      | -11% | 20.01 ± 0.25             |

All data are given as means ± SD (n = 3). Statistical analyses were performed using Student's *t* test as \*\**P* < 0.01 and \**P* < 0.05.

**Table S4. Cell wall features in the raw materials.**

| Samples               | Monosaccharides of hemicelluloses<br>(% total) |      |             |              |             |             | Lignin monolignols<br>(% total) |       |       |      |
|-----------------------|------------------------------------------------|------|-------------|--------------|-------------|-------------|---------------------------------|-------|-------|------|
|                       | Rha                                            | Fuc  | Ara         | Xyl          | Man         | Gal         | H                               | G     | S     | S/G  |
| WT                    | 0.39                                           | 0.04 | 2.44        | 90.19        | 2.81        | 4.14        | 0.13                            | 43.05 | 56.82 | 1.32 |
| <i>PtoDET2-OE-L1</i>  | 0.42                                           | 0.09 | <b>3.84</b> | <b>88.11</b> | <b>2.25</b> | <b>5.29</b> | 0.13                            | 43.56 | 56.32 | 1.29 |
| <i>PtoDET2-OE-L5</i>  | 0.41                                           | 0.06 | <b>3.10</b> | <b>89.45</b> | <b>2.26</b> | <b>4.72</b> | 0.14                            | 43.45 | 56.40 | 1.30 |
| <i>PtoDET2-KO-L11</i> | 0.41                                           | 0.04 | <b>2.05</b> | <b>90.50</b> | <b>3.01</b> | <b>3.99</b> | 0.12                            | 42.77 | 57.11 | 1.34 |
| <i>PtoDET2-KO-L17</i> | 0.42                                           | 0.05 | <b>2.05</b> | <b>90.46</b> | <b>3.02</b> | <b>4.00</b> | 0.15                            | 43.45 | 56.40 | 1.30 |

Rha, Rhamnose; Fuc, Fucose; Ara, Arabinose; Xyl, Xylose; Man, Mannose; Gal, Galactose.

**Table S5. Characteristic peaks of the FTIR spectra in biomass residues.**

| Reported wave number (cm <sup>-1</sup> ) | Observed wave number (cm <sup>-1</sup> ) | Functional group                                   | Assignment                         |
|------------------------------------------|------------------------------------------|----------------------------------------------------|------------------------------------|
| 898                                      | 898                                      | C—H vibration                                      | Cellulose                          |
| <b>1051</b>                              | <b>1052</b>                              | <b>C—O—C ring skeletal vibration</b>               | <b>Hemicelluloses</b>              |
| 1163                                     | 1160                                     | C—O—C asymmetric stretching                        | Cellulose                          |
| <b>1247</b>                              | <b>1244</b>                              | <b>C—O—C stretching of aryl-alkyl ether</b>        | <b>Lignin</b>                      |
| 1373                                     | 1367                                     | C—H <sub>2</sub> scissoring                        | Cellulose                          |
| 1430                                     | 1430                                     | C—H <sub>2</sub> bending                           | Cellulose                          |
| 1460                                     | 1460                                     | C—H <sub>3</sub> asymmetric bending                | Lignin                             |
| <b>1515</b>                              | <b>1508</b>                              | <b>C=C stretching of the aromatic ring</b>         | <b>Lignin</b>                      |
| <b>1603</b>                              | <b>1615</b>                              | <b>C=C stretching</b>                              | <b>Lignin</b>                      |
| <b>1735</b>                              | <b>1736</b>                              | <b>C=O stretching of acetyl or carboxylic acid</b> | <b>Hemicelluloses &amp; lignin</b> |

**Table S6. Comparison of bioethanol yields obtained in the transgenic poplar plant and other woody plants.**

|                                | Pretreatments                                                        | Ethanol yield<br>(% biomass) | Reference           |
|--------------------------------|----------------------------------------------------------------------|------------------------------|---------------------|
| <b>WT<br/>(poplar)</b>         | <b>Na<sub>2</sub>S+Na<sub>2</sub>CO<sub>3</sub>, 150 °C, 20 min</b>  | <b>11.79%</b>                | <b>This study</b>   |
| <b>DET2-OE-L1<br/>(poplar)</b> | <b>Na<sub>2</sub>S+Na<sub>2</sub>CO<sub>3</sub>, 150 °C, 20 min</b>  | <b>15.68%</b>                |                     |
| WT (poplar)                    | Hot water, 180 °C, 20 min                                            | 4.1%                         | Biswal et al., 2018 |
| <i>GAUT4</i> -KD (poplar)      | Hot water, 180 °C, 20 min                                            | 6.7%                         | Biswal et al., 2018 |
| <i>COMT3</i> -TG (poplar)      | Hot water, 180 °C, 20 min                                            | 6.1%                         | Biswal et al., 2018 |
| WT (poplar)                    | 1% Ca(OH) <sub>2</sub> , 121 °C, 6 h                                 | 12.1% (48h)                  | Cai et al., 2016    |
| <i>MOMT4</i> -OE (poplar)      | 1% Ca(OH) <sub>2</sub> , 121 °C, 6 h                                 | 14.3% (48h)                  | Cai et al., 2016    |
| <i>Eucalyptus globulus</i>     | Steam explosion, 190 °C, 10 min, 1.5% H <sub>2</sub> SO <sub>4</sub> | 10.75-11.52%                 | Ko et al., 2012     |
|                                | Steam explosion, 195 °C, 34 min                                      | 10.18%                       | Romaní et al., 2013 |
| Olive tree                     | Steam explosion, 230 °C, 5 min, 2% H <sub>2</sub> SO <sub>4</sub>    | 7.2%                         | Cara et al., 2008   |

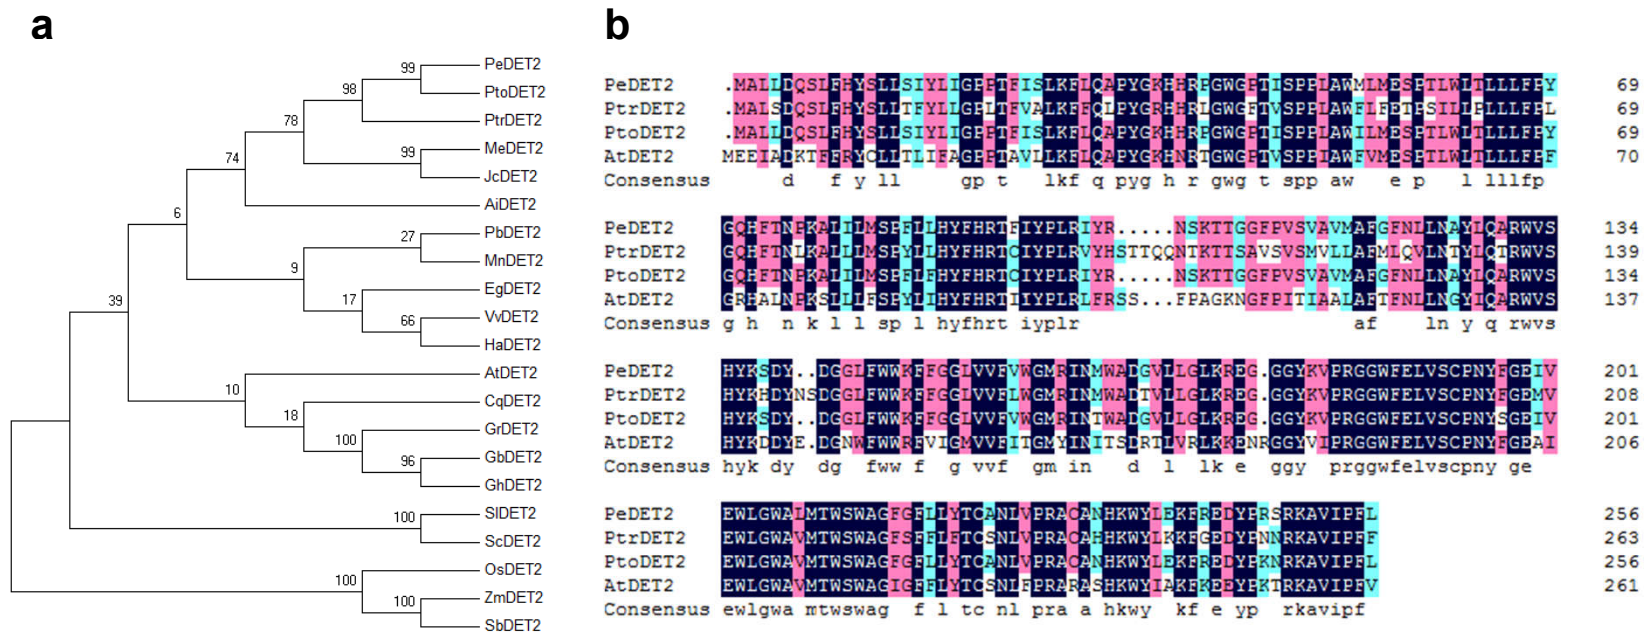

**Fig S1. Multiple sequence alignment and phylogenetic analysis of DET2.** (a) The phylogenetic relationship of PtoDET2 with other DET2 proteins. (b) Sequence alignments of PtoDET2. The GenBank accession numbers of DET2s were listed in Table S1.

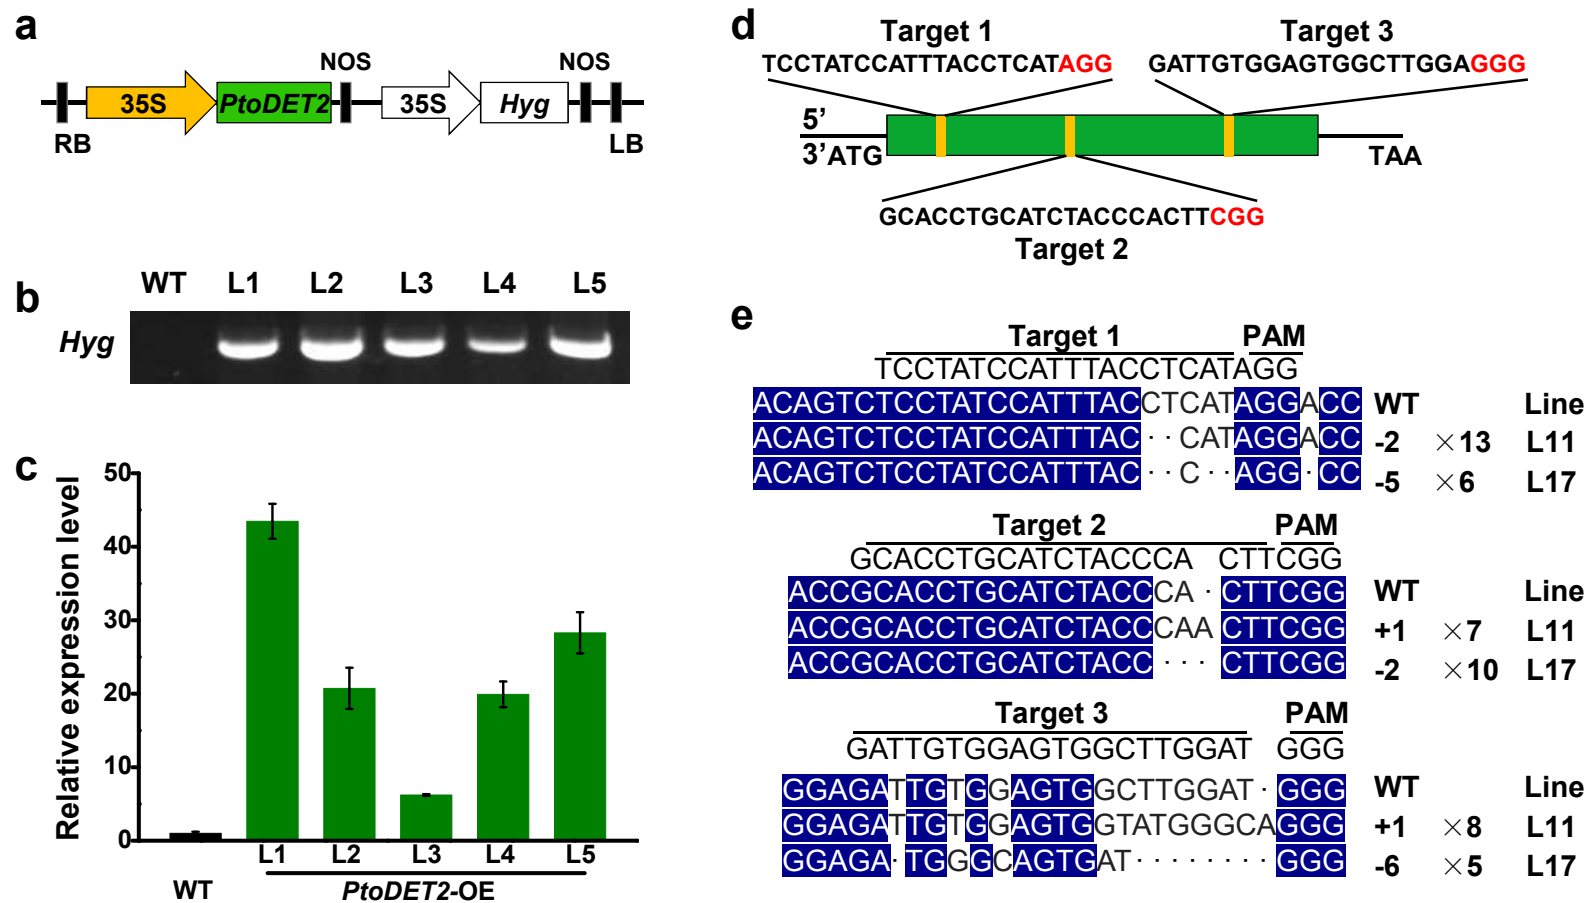

**Fig S2. Generation of transgenic poplars.** (a) Diagram of the *PtoDET2*-OE vector. (b) The Hyg levels in the *PtoDET2*-OE lines. (c) The expression levels of *PtoDET2* in the *PtoDET2*-OE lines. (d) Diagram of three CRISPR/Cas9 target sites of *PtoDET2*. T1, T2 and T3 indicate the positions of sgRNA-targeted sites. (e) Determination of the mutations in the coding region of *PtoDET2* generated by the CRISPR/Cas9 system. The text on the right summarizes mutation details in two independent CRISPR/Cas9-generated lines (L11 and L17). Primers are listed in Table S2. The poplar *ubiquitin* gene was used as an internal control.



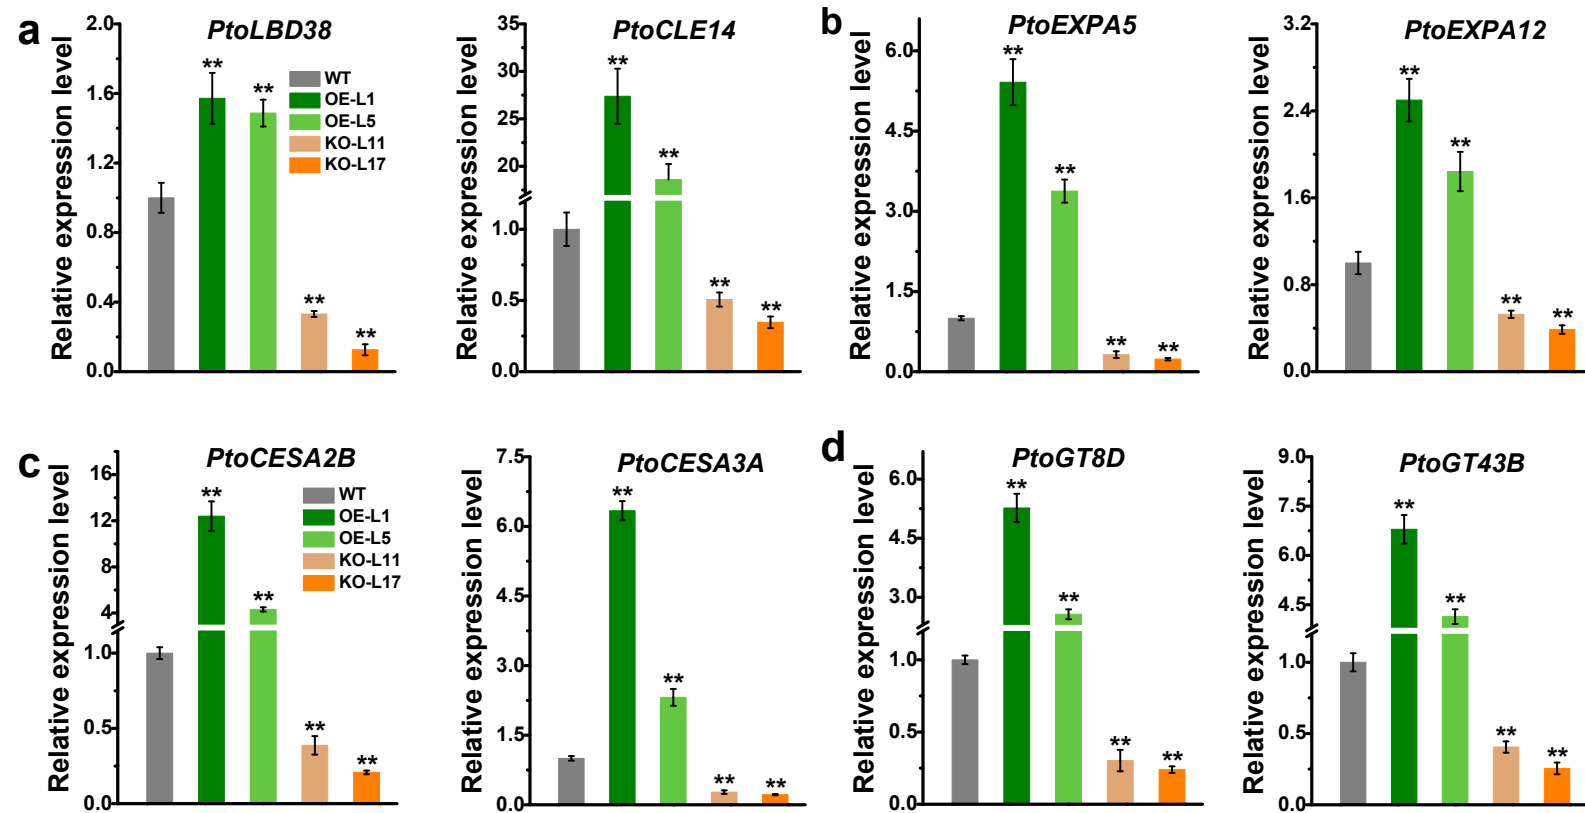

**Fig S3. Expression of cell differentiation, expansion and wall biosynthetic genes in *PtoDET2* transgenic plants.** (a) Cell differentiation genes; (b) Cell expansion genes; (c) Cellulose biosynthetic genes; (d) Hemicellulose biosynthetic genes. Primers are listed in Table S2. The poplar *ubiquitin* gene was used as an internal control. All data are given as means  $\pm$  SD from three biological repeats. Statistical analyses were performed using Student's *t* test as  $**P < 0.01$ .

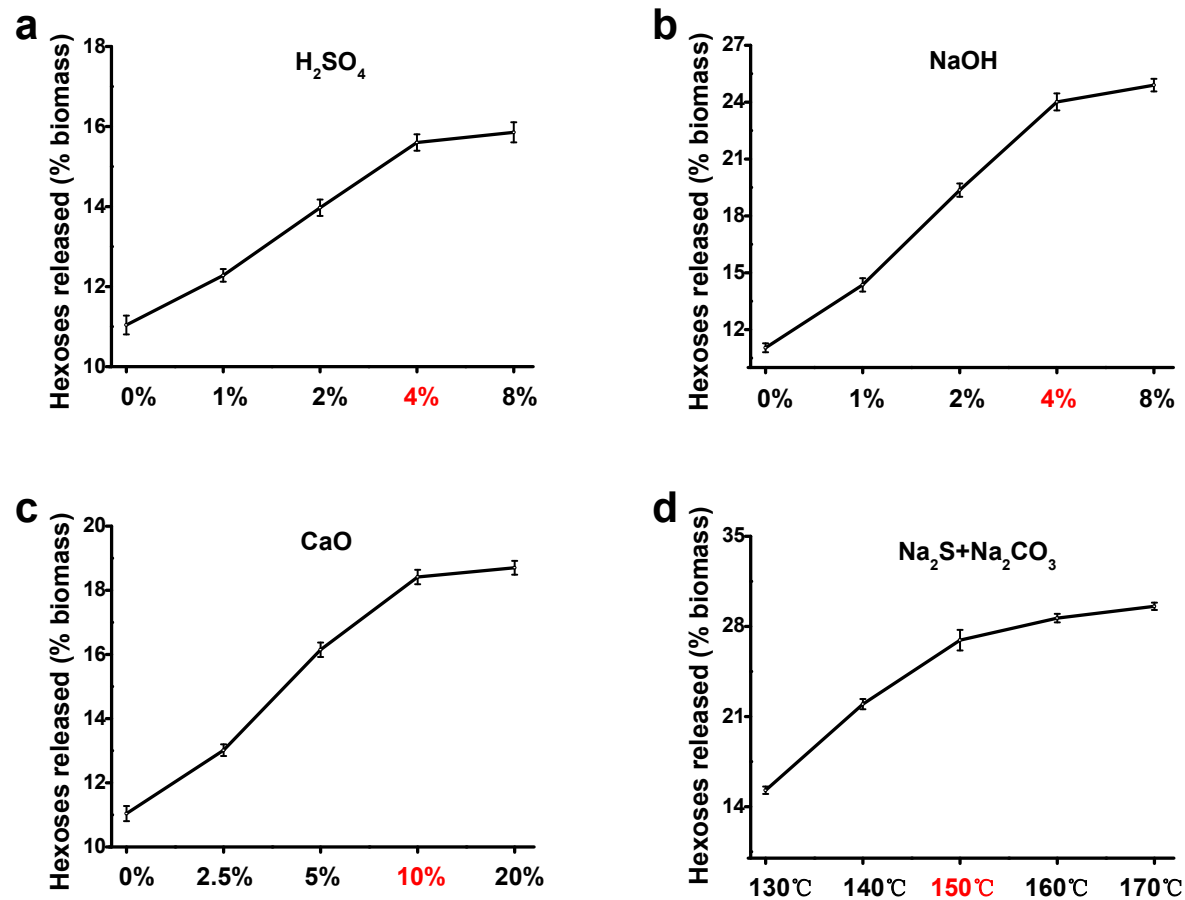

**Fig S4. Hexoses released from enzymatic hydrolysis after various chemical pretreatments.** (a) Hexose yields released from enzymatic (mixed-cellulase) hydrolysis after pretreatments with  $\text{H}_2\text{SO}_4$ , (b) NaOH, (c) CaO or (d)  $\text{Na}_2\text{S} + \text{Na}_2\text{CO}_3$ . All data are given as means  $\pm$  SD from three technical repeats.

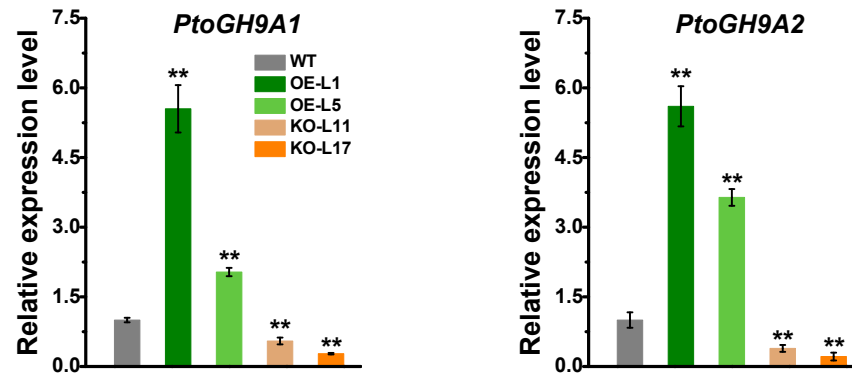

**Fig S5. Expression of *PtoGH9* genes in transgenic *PtoDET2* plants.** Primers are listed in Table S2. The poplar *polyubiquitin* gene was used as an internal control. All data are given as means  $\pm$  SD from three technical repeats. Statistical analyses were performed using Student's *t* test as \*\* $P < 0.01$ .

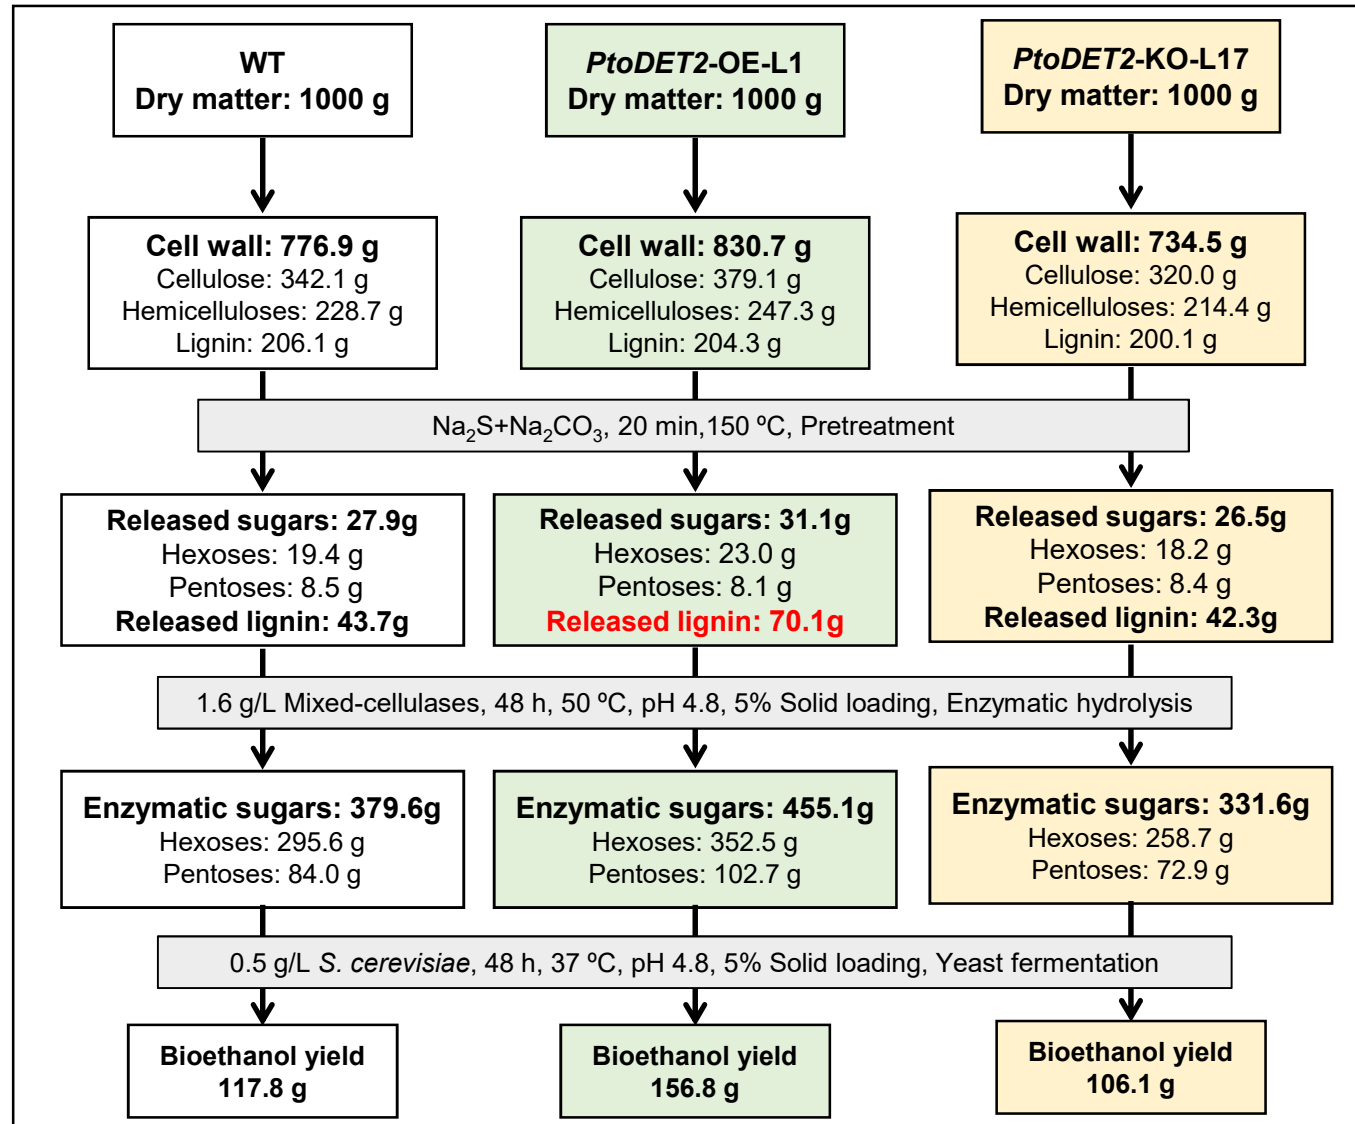

**Fig S6. Mass balance analysis for bioethanol production during biomass process with green liquor in transgenic poplar lines and WT.**

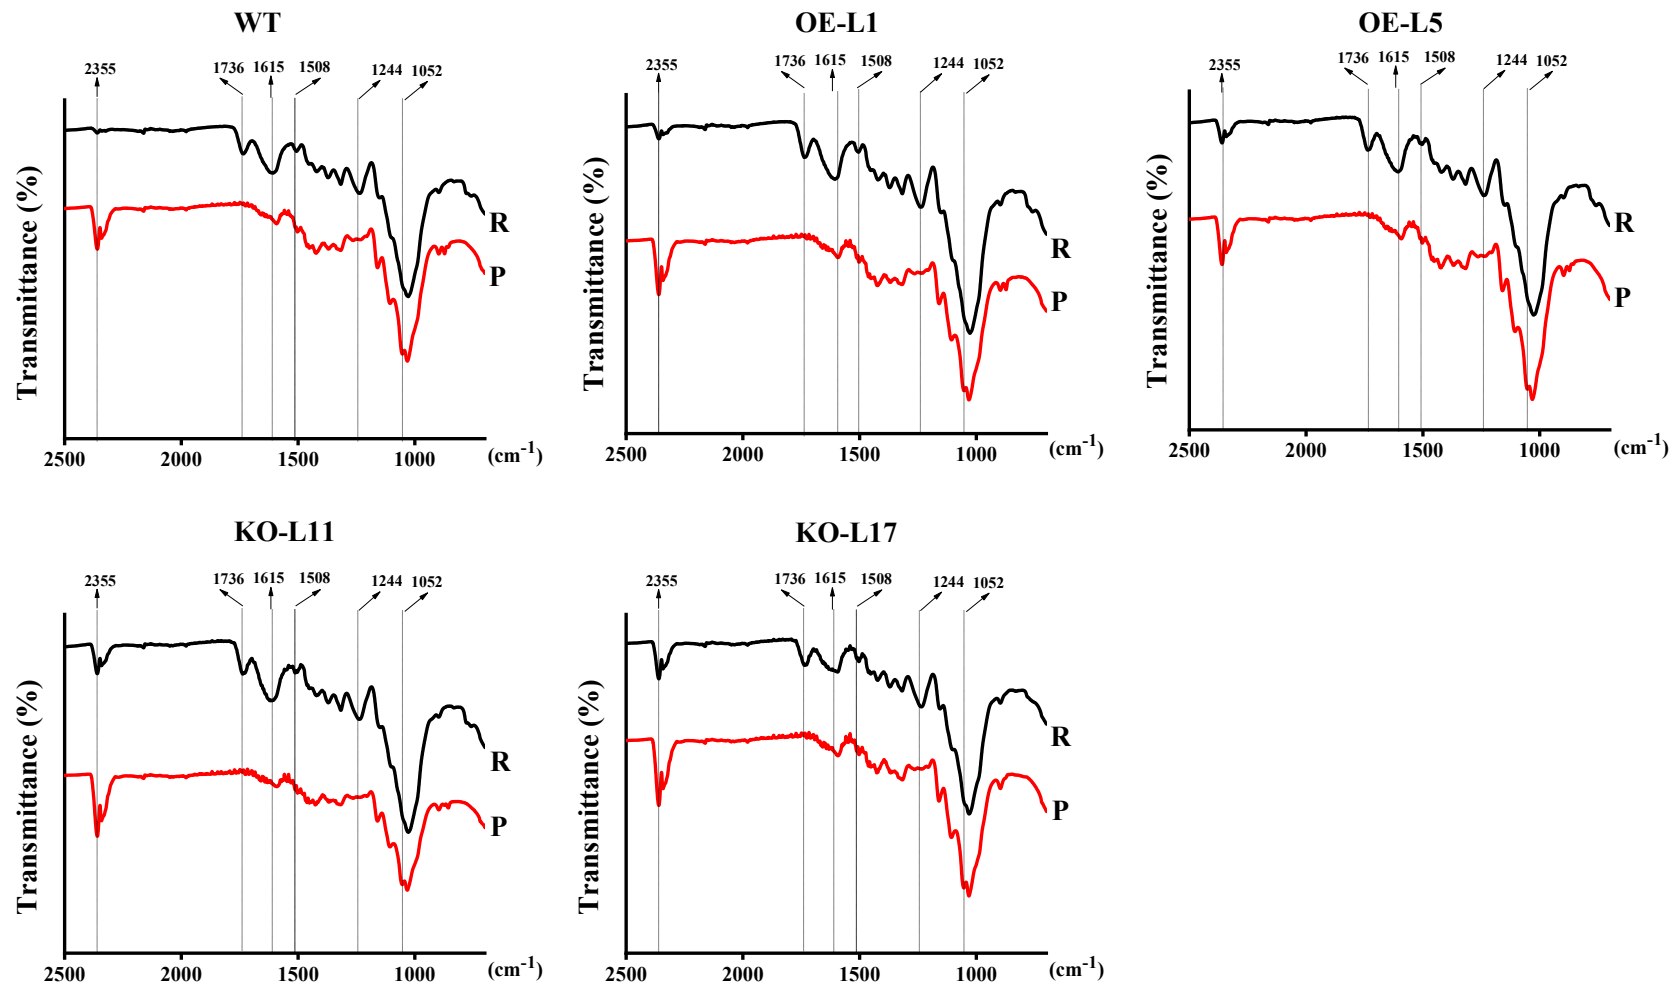

**Fig S7. Fourier transform infrared spectra (FTIR) profiling in transgenic poplar lines and WT.** Black line as raw material (R) and red line as biomass residue from  $\text{Na}_2\text{S}+\text{Na}_2\text{CO}_3$  pretreatment (P). Characteristic peaks of the FTIR spectra were referred in Table S5.

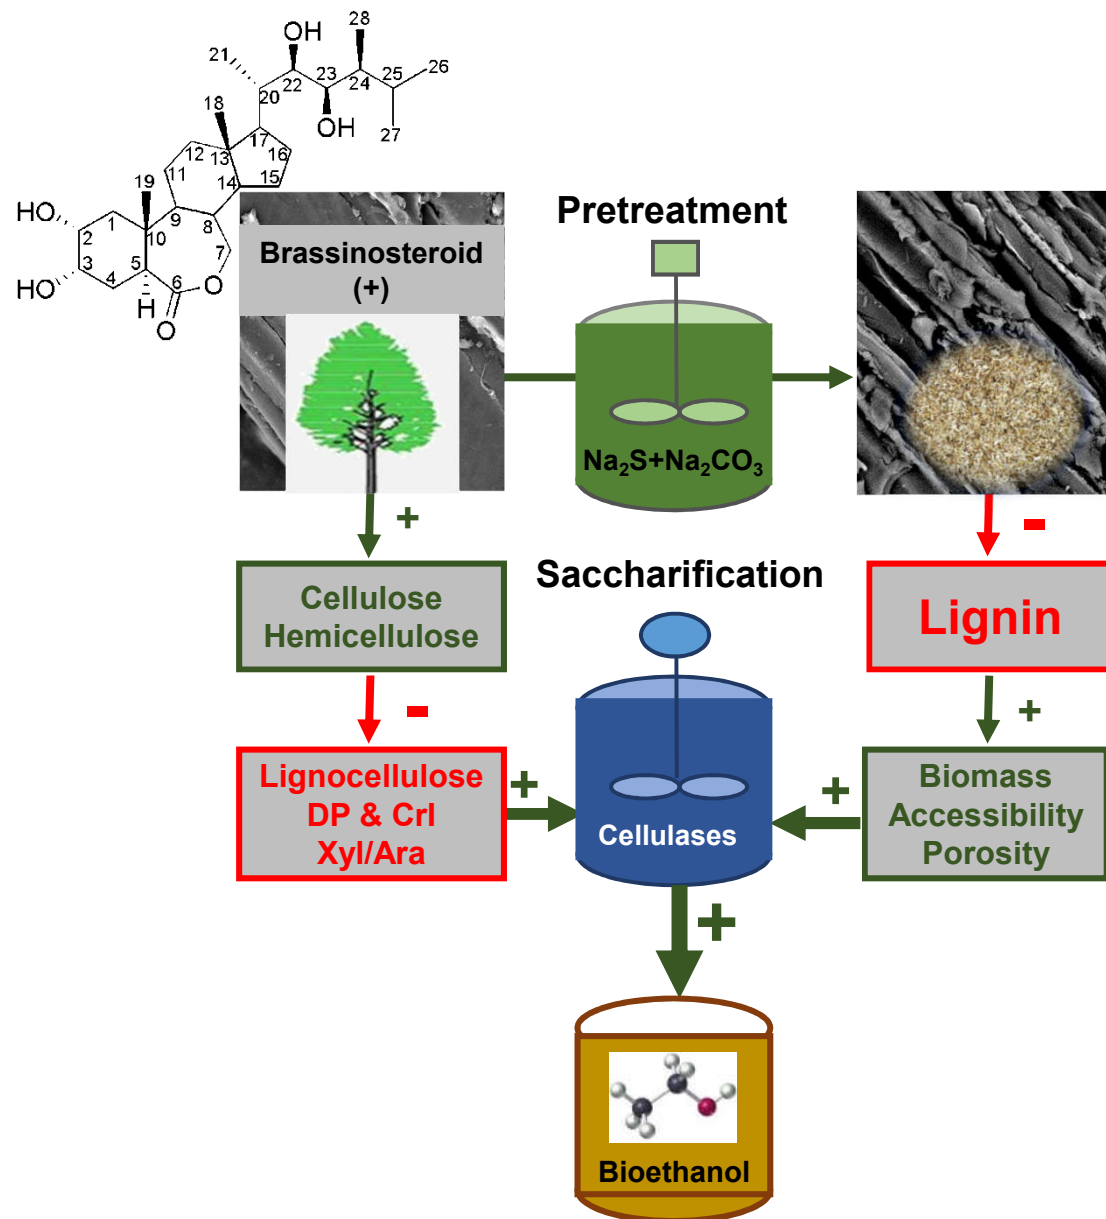

**Fig S8.** A hypothetical model to demonstrate an integrated approach effective for maximum bioethanol production in lignocellulose-improved transgenic poplar plants overproducing BRs.
